# Supplementary material
Source: publisher figshare collection journal article supplement (https://asha.figshare.com/articles/dataset/_/8202176)

## Supplemental Material S2. Traceplots and autocorrelation plots.

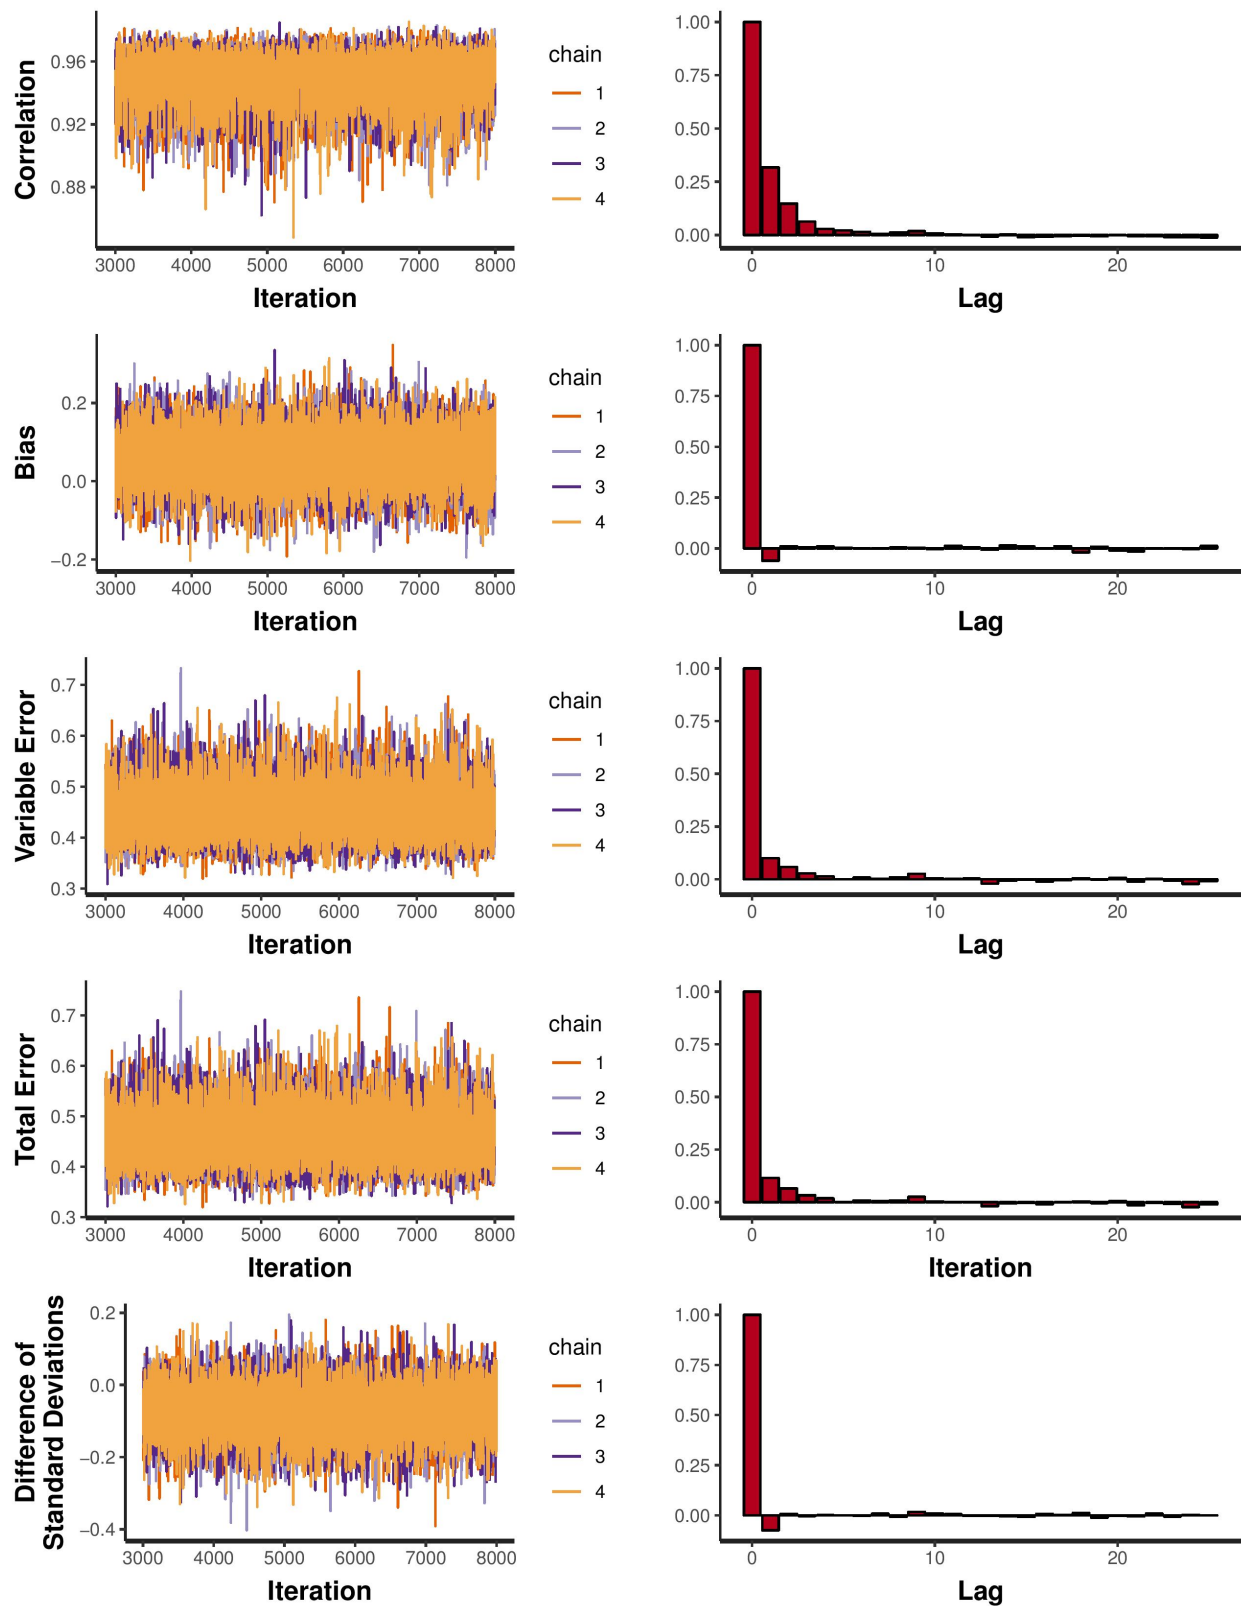

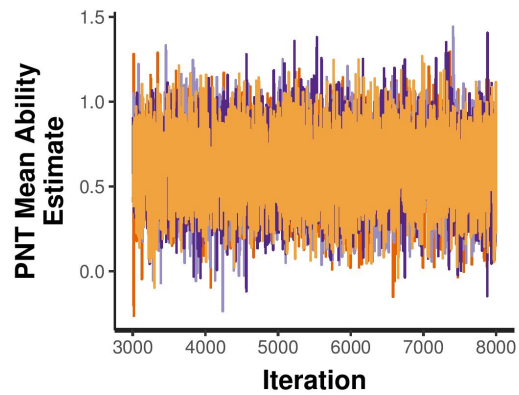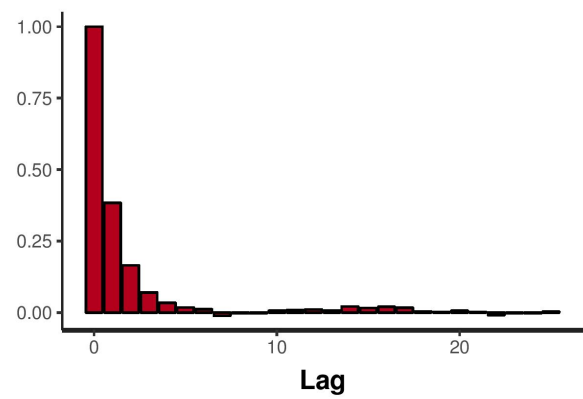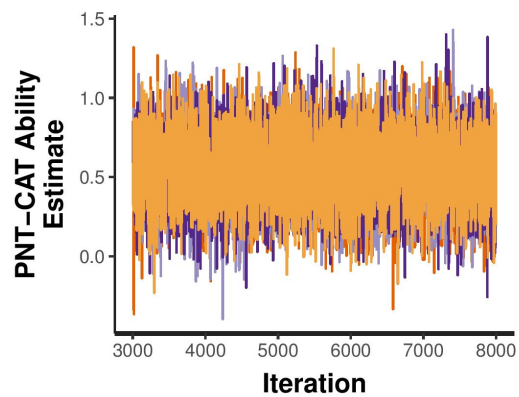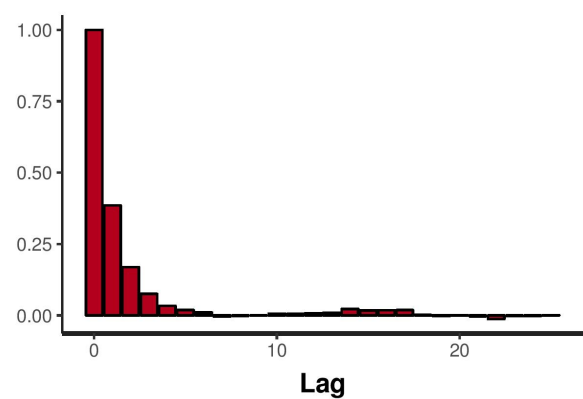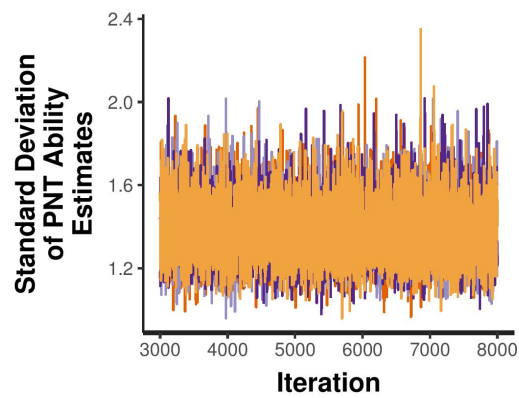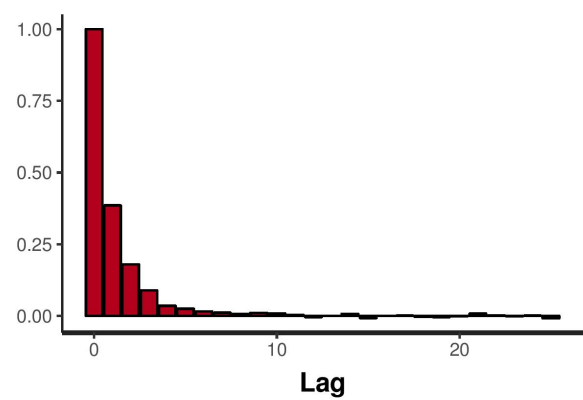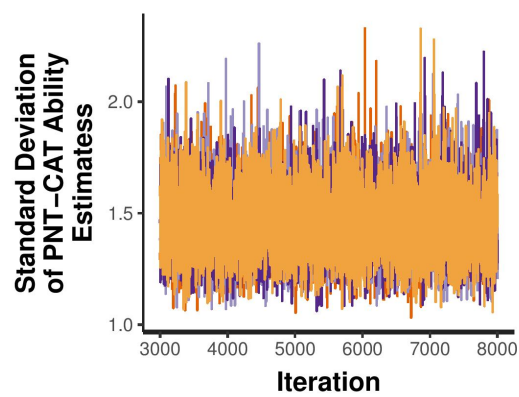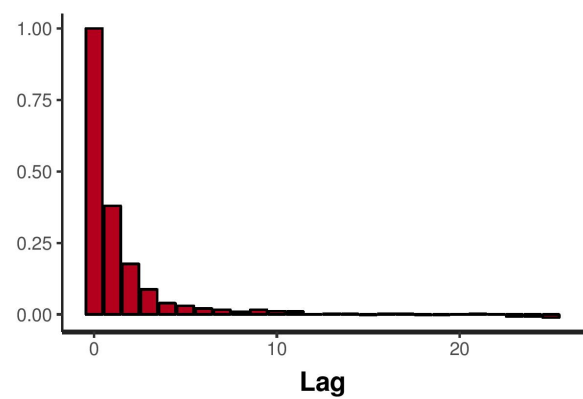

Supplement: Supplementary file 2 [file 1]
